# Supplementary material
Source: PubMed Central journal article supplement (PMC1904486)

## Supplemental data

### Oxidative metabolism and PGC-1 $\beta$ attenuate macrophage-mediated inflammation

Divya Vats, Lata Mukundan, Justin I. Odegaard, Lina Zhang, Kristi L. Smith, Christine R. Morel, David R. Greaves, Peter J. Murray, and Ajay Chawla

#### Supplemental Figures

**Figure 1S.** Alternative, but not classical, activation of macrophage induces the expression of genes important in oxidative metabolism. Average fold induction is indicated below the respective bands. A representative experiment (n=3) is shown.

**Figure 2S.** Requirement for oxidative metabolism in expression of alternatively activated markers. **(A-C).** Cell surface expression of dectin-1, mannose receptor and PD-L2 was quantified by flow cytometry. **(D).** Treatment of macrophages with metabolic inhibitors does not significantly alter calcium flux. **(E).** Maintenance of ATP homeostasis during treatment of macrophages with inhibitors of oxidative metabolism. A representative experiment (n=3) is shown.

**Figure 3S.** **(A).** Alternative (IL-4), but not classical (IFN $\gamma$ /LPS), activation induces mitochondrial biogenesis, as assessed by cellular staining of MitoFluor green. **(B).** Northern blot analysis for transcriptional regulators of mitochondrial biogenesis in

wild type and STAT6  $-/-$  macrophages. PGC-1 $\alpha$  mRNA was not detectable in wild type or STAT6 null macrophages by Northern blots or quantitative RT-PCR (data not shown).

**Figure 4S.** Constitutive expression of PGC-1 $\beta$  in macrophages. **(A).** Immunblotting for f-PGC-1 $\beta$  in wild type macrophages. **(B).** Constitutive expression of f-PGC-1 $\beta$  enhances fatty acid oxidation in macrophages. **(C).** Levels of total and phospho STAT6 in vector and PGC-1 $\beta$  infected macrophages. **(D).** PGC-1 $\beta$  expression enhances IL-4 induced cell surface expression of dectin-1. \*P<0.05.

**Figure 5S. (A-B).** Knockdown of PGC-1 $\beta$  by RNAi does not significantly alter classical activation of macrophages. Secretion of IL-6 (A) and IL-12 p40 subunit (B) by macrophages retrovirally infected with GFP or PGC-1 $\beta$  RNAi. **(C-D)** Expression of GFP RNAi does not lead to inflammatory activation of macrophages, as assessed by secretion of IL-6 (C) and IL-12 p40 subunit (D).

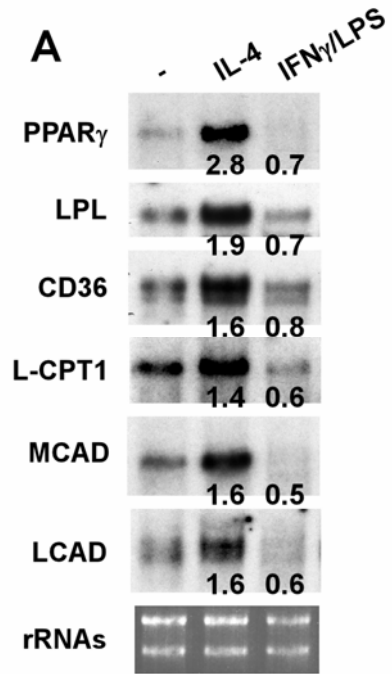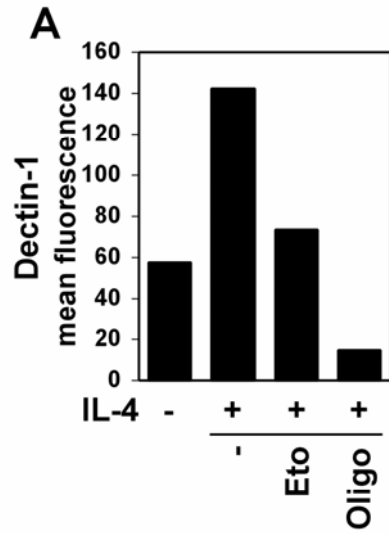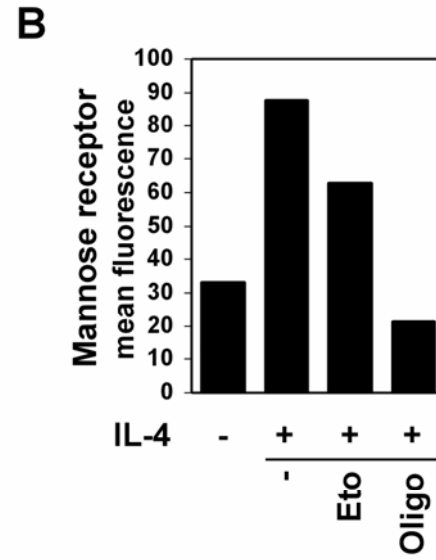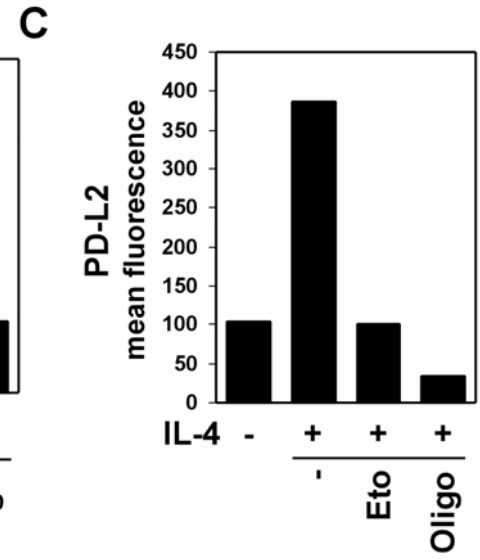

Vats-Figure 2S

Vats-Figure 1S

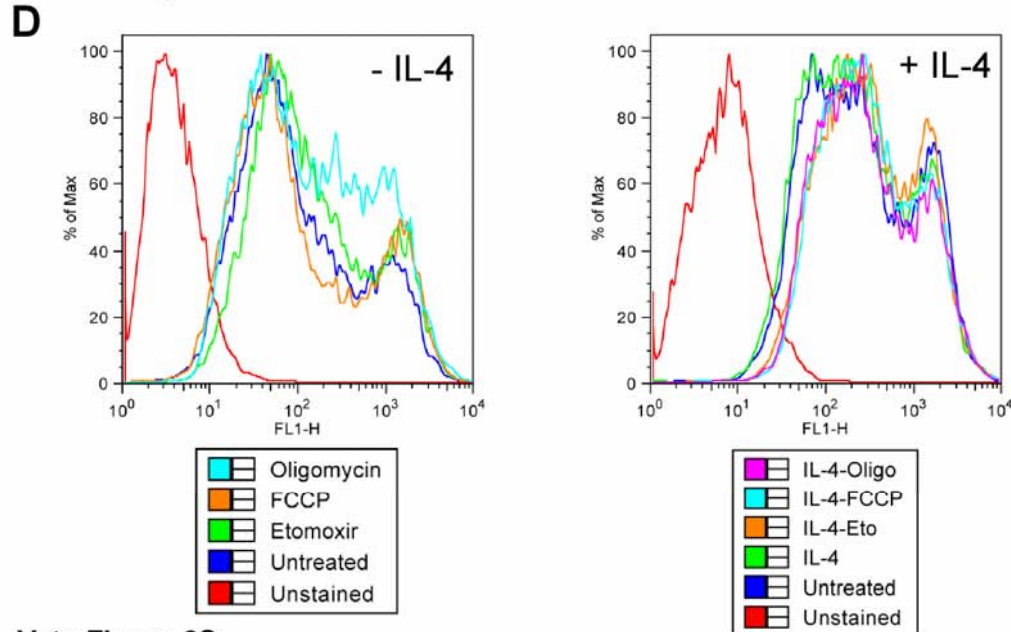

Vats-Figure 2S

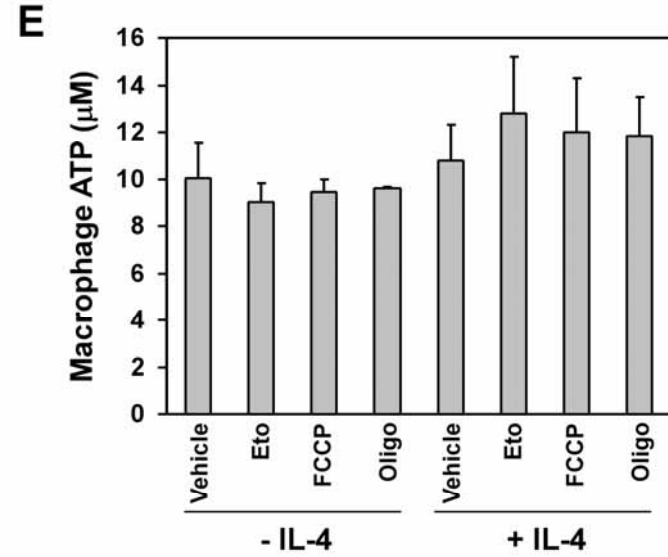

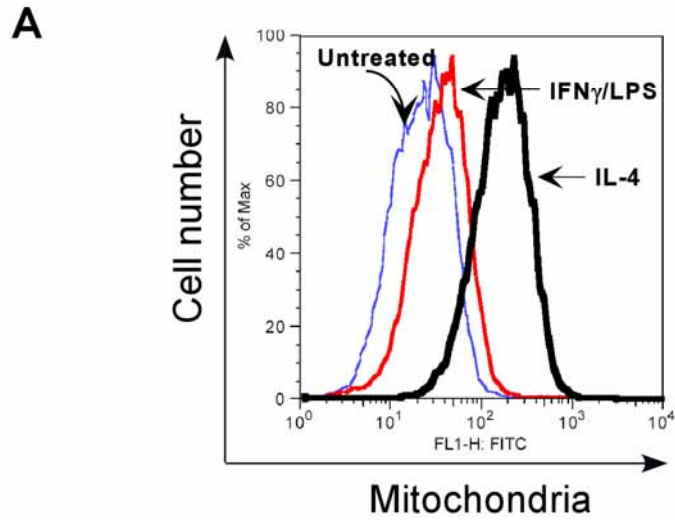

Vats-Figure 3S

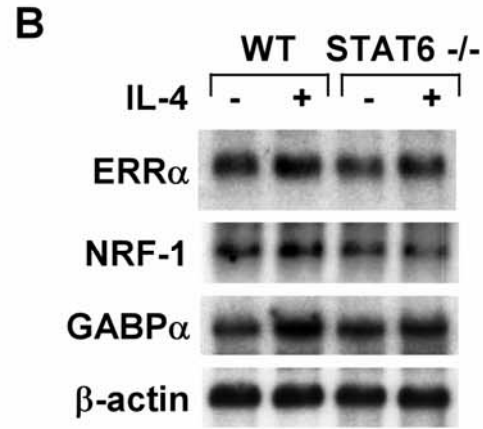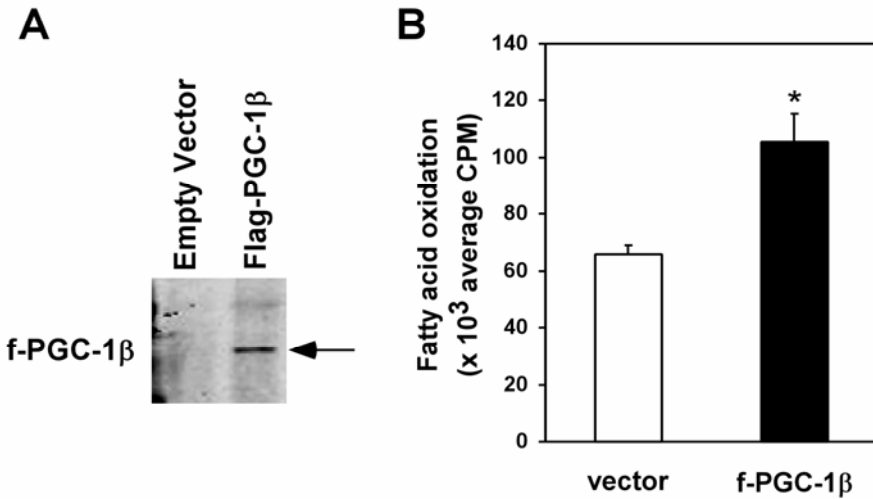

Vats-Figure 4S

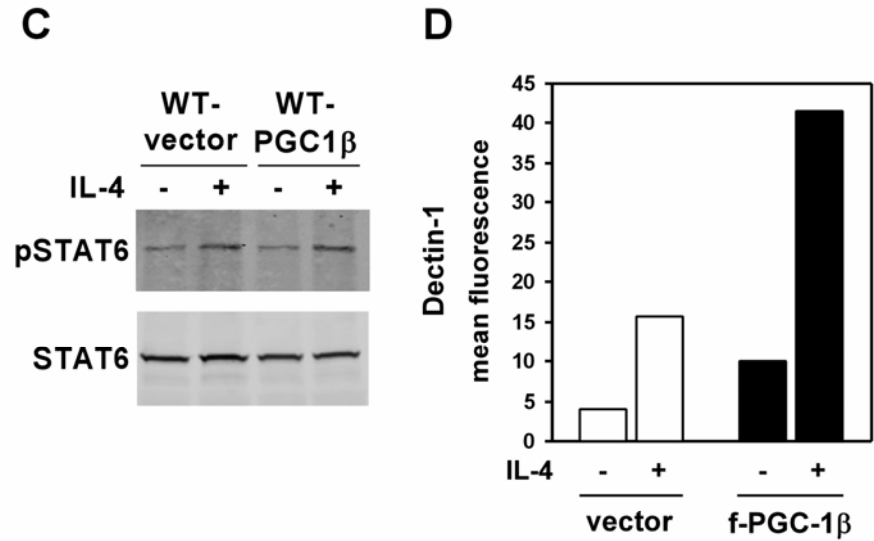

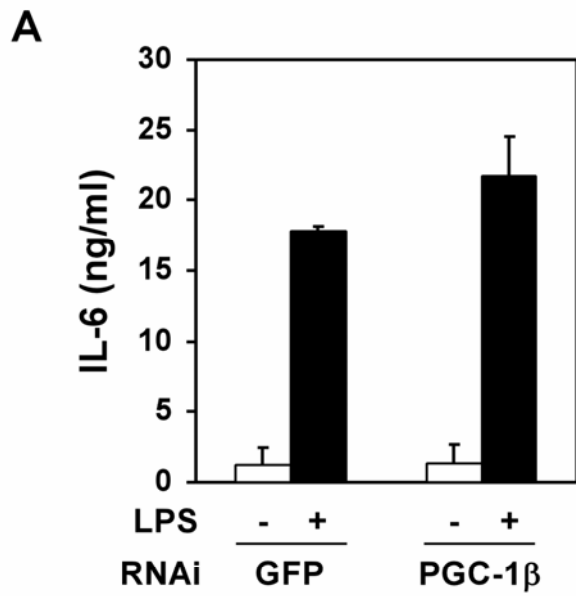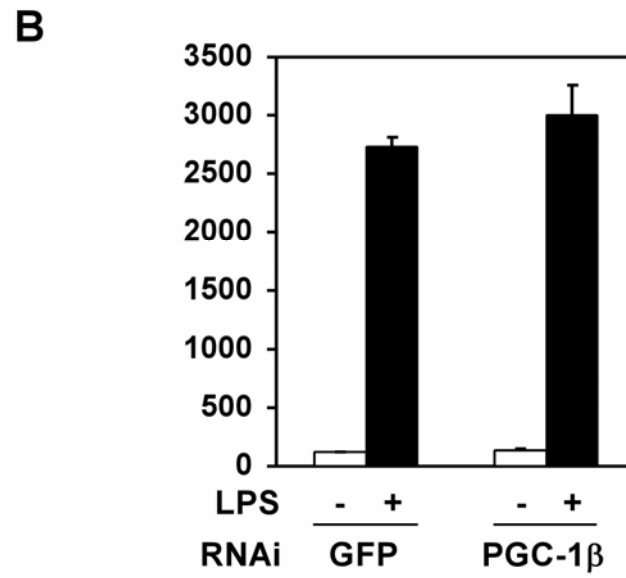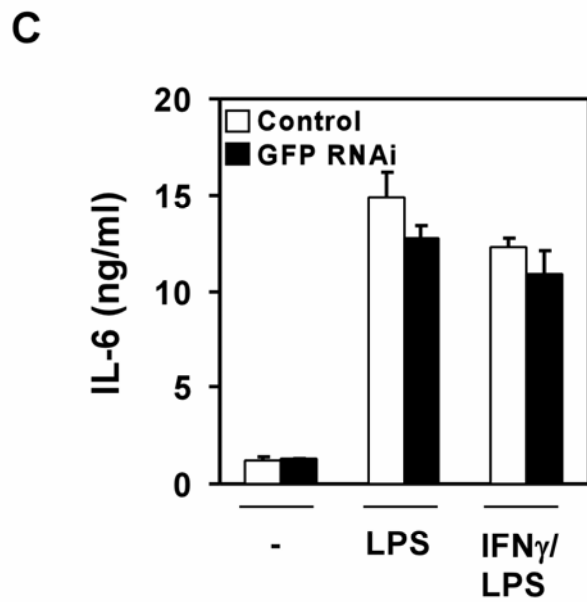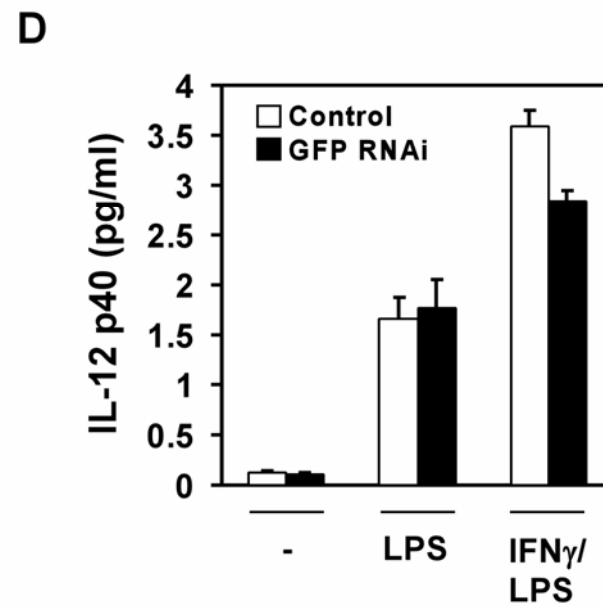

Supplement: NIHMS17131-supplement-Supplementary.pdf [file NIHMS17131-supplement-Supplementary.pdf]
